# Supplementary material
Source: HighWire-hosted journal article supplement (https://www.annfammed.org/highwire/filestream/8665/field_highwire_adjunct_files/0/Tran_Supp_Appendix_Tables1-3-Figs_1-3.pdf)
Supplement: Tran_Supp_Appendix_Tables1-3-Figs_1-3.pdf [file Tran_Supp_Appendix_Tables1-3-Figs_1-3.pdf]

Supplemental Appendixes Tables 1-3 and Figures 1-4 for:

Sidorkiewicz S, Tran V, Cousyn C, Perrodeau E, Ravaud P. discordance between drug adherence as reported by patients and drug importance as assessed by physicians. *Ann Fam Med*. 2016;14(5):415-421.

## **Supplemental Appendix**

**Supplemental Appendix, Table 1. Demographic and clinical characteristics of physicians (n=59)**

**Supplemental Appendix, Table 2. Results of the separate analysis of the two samples (inpatients and outpatients)**

**Supplemental Appendix, Figure 1. Drug importance according to patients and physicians (n=487 drugs)**

**Supplemental Appendix, Figure 2. Drug adherence according to patients and physicians (n=488 drugs)**

**Supplemental Appendix, Figure 3. Drug self-reported adherence by patients and drug importance according to their physician (n=498 drugs)**

**Supplemental Appendix, Table 3. Reasons for medication non-adherence reported by patients**

**Supplemental Appendix, Table 1. Demographic and clinical characteristics of physicians (n=59)**

|                                           |                      |                  |
|-------------------------------------------|----------------------|------------------|
| <b>Age – median (IQR)</b>                 |                      | 57.4 (49.8-62.4) |
| <b>Sex – no (%)</b>                       |                      |                  |
|                                           | Male                 | 25 (41.0)        |
| <b>Year of starting practice – no (%)</b> |                      |                  |
|                                           | Before 1985          | 25 (41.1)        |
|                                           | 1986 to 1999         | 23 (37.7)        |
|                                           | After 2000           | 11 (18.0)        |
| <b>Medical specialty– no (%)</b>          |                      |                  |
|                                           | General practitioner | 56 (94.9)        |
| <b>Duration of consultation– no (%)</b>   |                      |                  |
|                                           | < 10 min             | 3 (94.9)         |
|                                           | 10-20 min            | 32 (54.2)        |
|                                           | >20 min              | 24 (40.7)        |

**Supplemental Appendix, Table 2. Results of the separate analysis of the two samples (inpatients and outpatients)**

|                                                                                                                    | <b>All patients<br/>n=128 (100%)<br/>(results in the<br/>manuscript)</b> | <b>Outpatients<br/>n=90 (70.3%)</b> | <b>Inpatients<br/>n=38 (29.7%)</b> |
|--------------------------------------------------------------------------------------------------------------------|--------------------------------------------------------------------------|-------------------------------------|------------------------------------|
| Correlation of patient and physician assessments of <b>drug adherence</b>                                          | $r_s = -0.25$ ( $p < 0.05$ )                                             | $r_s = -0.29$ ( $p < 0.05$ )        | $r_s = -0.19$ (NS)                 |
| Correlation of patient and physician assessments of <b>drug importance</b>                                         | $r_s = 0.07$ ( $p < 0.05$ )                                              | $r_s = 0.08$ (NS)                   | $r_s = 0.08$ (NS)                  |
| Correlation of <b>drug importance rated by primary care providers and drug adherence self-reported by patients</b> | $r_s = -0.04$ (NS)                                                       | $r_s = -0.04$ (NS)                  | $r_s = -0.03$ (NS)                 |

NS: non significant

**Supplemental Appendix, Figure 1. Drug importance according to patients and physicians (n=487 drugs)**

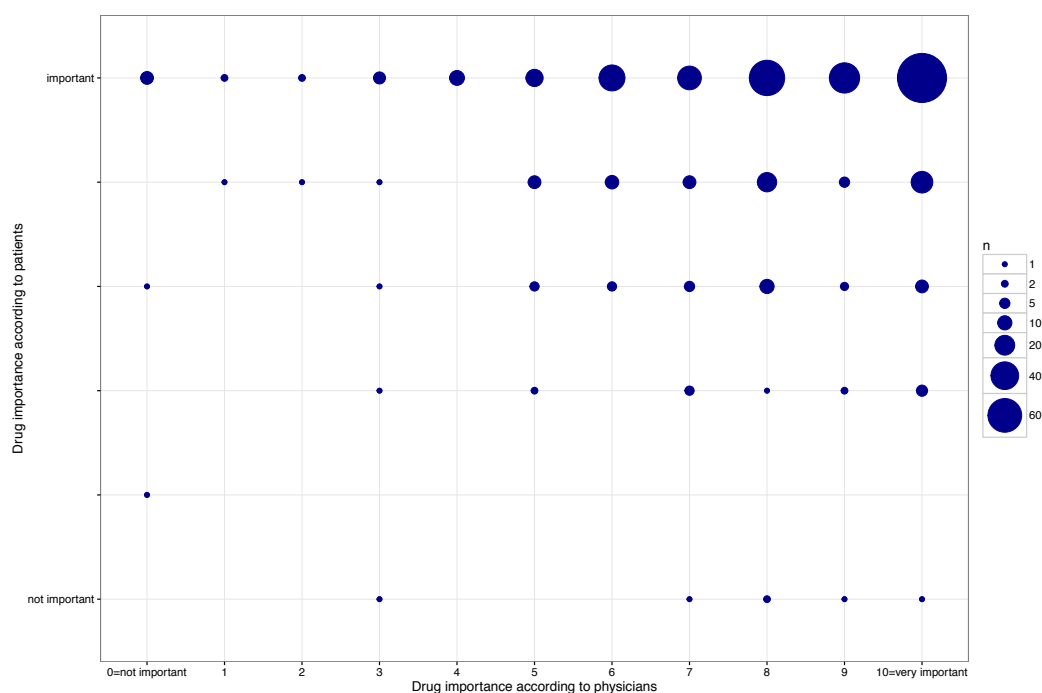

**Supplemental Appendix, Figure 2. Drug adherence according to patients and physicians (n=488 drugs)**

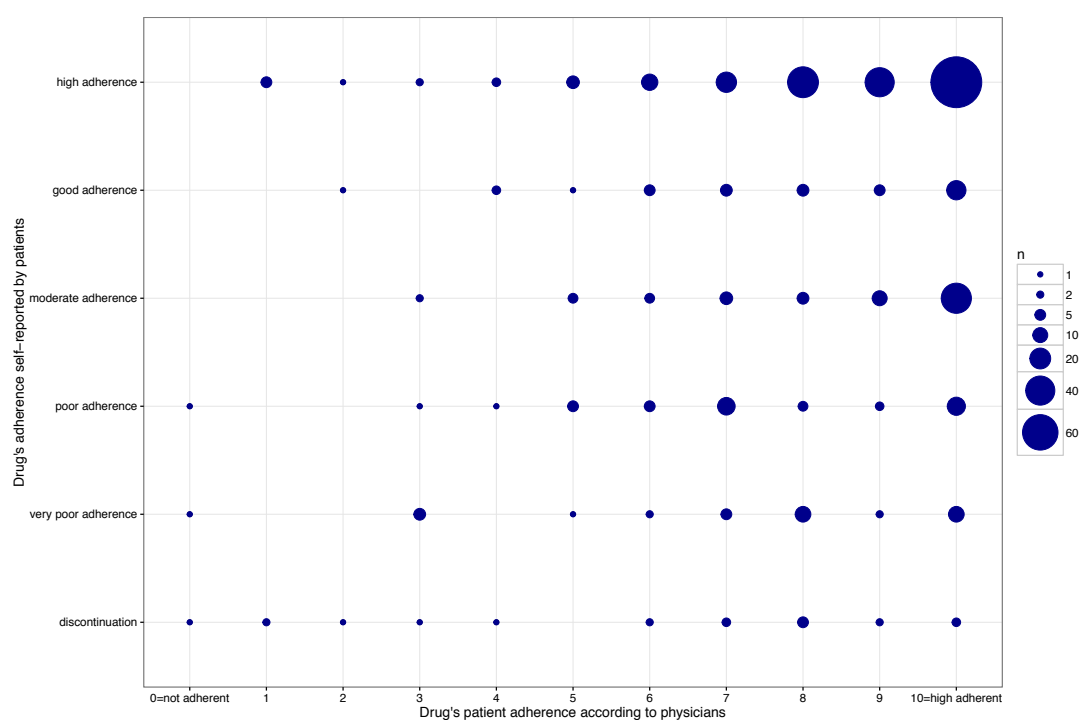

**Supplemental Appendix, Figure 3. Drug self-reported adherence by patients and drug importance according to their physician (n=498 drugs)**

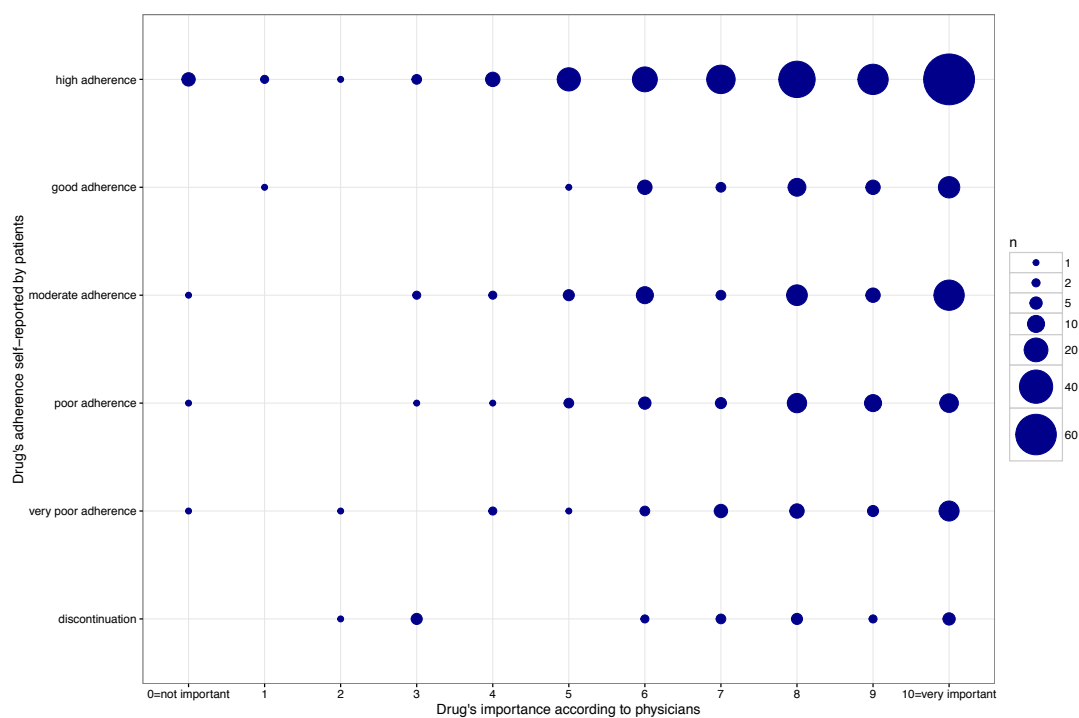

**Supplemental Appendix, Table 3. Reasons for medication non-adherence reported by patients**

| Category of reasons for non-adherence                  | Example of reasons reported by patients                                                             | No. of drugs concerned |
|--------------------------------------------------------|-----------------------------------------------------------------------------------------------------|------------------------|
| <b>Unintentional reasons</b>                           |                                                                                                     |                        |
| Forgetting to take medications                         | <i>"Omissions"</i>                                                                                  | 63                     |
| Careless about times for taking medication             | <i>"Time lags because of various work schedules"</i><br><i>"Jet lag (flight crew)"</i>              | 4                      |
| Running out of medication                              | <i>"Forgetting to renew my prescription"</i><br><i>"Scheduling issues to renew my prescription"</i> | 11                     |
| <b>Intentional reasons</b>                             |                                                                                                     |                        |
| Skipping medication because feeling better             | <i>"Because I am getting better"</i>                                                                | 5                      |
| Side effects                                           | <i>"Leg cramps at night", "Altered sense of taste"</i>                                              | 17                     |
| Not wanting to take medication without explicit reason | <i>"I want to stop it"</i>                                                                          | 16                     |
| Not thinking it is helping                             | <i>"I have doubts about the efficiency of this medicine"</i>                                        | 3                      |
| Polymedication                                         | <i>"Too many medications"</i>                                                                       | 1                      |
